# Supplementary material
Source: publisher figshare collection journal article supplement (https://acs.figshare.com/ndownloader/files/3731530)
Supplement: Supplementary file 1 [file 3731530]

# Supporting Information

## Redox-Active Molecular Nanowire Flash Memory for High-Endurance and High-Density Nonvolatile Memory Applications

*Hao Zhu<sup>1,2\*</sup>, Sujitra J. Pookpanratana<sup>2</sup>, John E. Bonevich<sup>3</sup>, Sean N. Natoli<sup>4</sup>, Christina A. Hacker<sup>2\*</sup>, Tong Ren<sup>4</sup>, John S. Suehle<sup>2</sup>, Curt A. Richter<sup>2</sup>, and Qiliang Li<sup>1\*</sup>*

<sup>1</sup> Department of Electrical and Computer Engineering, George Mason University, Fairfax, Virginia 22030, United States

<sup>2</sup> Semiconductor and Dimensional Metrology Division, National Institute of Standards and Technology, Gaithersburg, Maryland 20899, United States

<sup>3</sup> Materials Science and Engineering Division, National Institute of Standards and Technology, Gaithersburg, Maryland 20899, United States

<sup>4</sup> Department of Chemistry, Purdue University, West Lafayette, Indiana 47907, United States

\*Email: [hzhu3@gmu.edu](mailto:hzhu3@gmu.edu), [christina.hacker@nist.gov](mailto:christina.hacker@nist.gov), [qli6@gmu.edu](mailto:qli6@gmu.edu)

X-ray photoelectron spectroscopy (XPS) characterization was performed on samples consisting of Ru<sub>2</sub> molecules attached to a p-type Si (100) substrate with a thin (2~3 nm) SiO<sub>2</sub>. Figure S1 shows the XPS results of a Ru<sub>2</sub>/SiO<sub>2</sub>/Si sample and a SiO<sub>2</sub>/Si reference sample. Ru 3p and Ru 3d peaks were clearly observed with the Ru<sub>2</sub>-attached sample compared with the reference sample.

Cyclic voltammetry (CV) characterization was performed on samples consisting of the Ru<sub>2</sub> molecules attached onto the patterned square-shaped active area that was etched into a 110 nm SiO<sub>2</sub>/Si substrate. The active area is 100×100 μm<sup>2</sup>. Figure S2 shows the schematic of CV characterization setup. The measurements were carried out in a standard probe station, with the backside contact made via the probe station chuck. A solution of 1.0M tetrabutylammonium hexafluorophosphate (TBAH) in propylene carbonate (PC) was used as the conducting gate electrolyte. Polypropylene micropipette tip containing the silver counter electrode and the electrolyte was lowered until only a small amount of electrolyte was spread across the active area. During the measurement, the voltage was applied on the substrate, and the CV was obtained using a CHI600 electrochemical analyzer.

Figure S3 illustrates the CV of the electrolyte-Ru<sub>2</sub>-oxide-silicon capacitor structure at 1 V/s scan rate. Two pairs of oxidation/reduction peaks were observed, related with the redox behavior of the two redox sites in Ru<sub>2</sub> molecule.

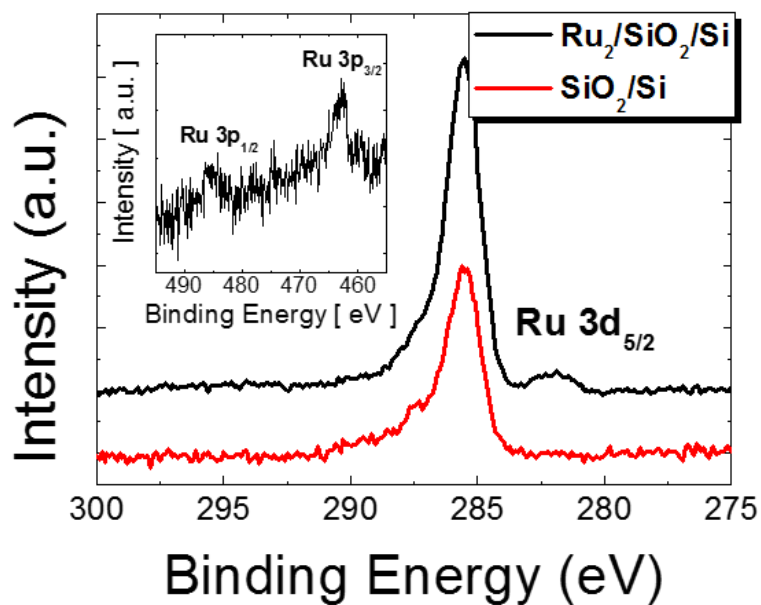

**Figure S1.** XPS of the  $\text{SiO}_2/\text{Si}$  samples with and without  $\text{Ru}_2$  molecule attachment. Inset: XPS of the  $\text{Ru}_2/\text{SiO}_2/\text{Si}$  sample showing Ru 3p peaks.

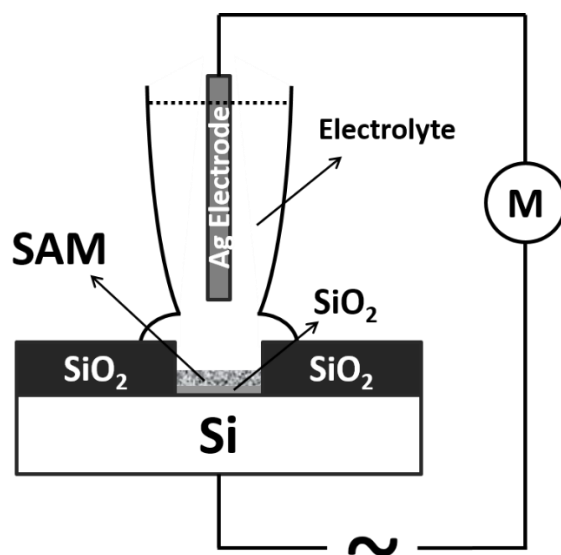

**Figure S2.** Schematic of the characterization setup for CV measurements. “ $\sim$ ” represents the voltage source for the measurement, and M represents the electrometer.

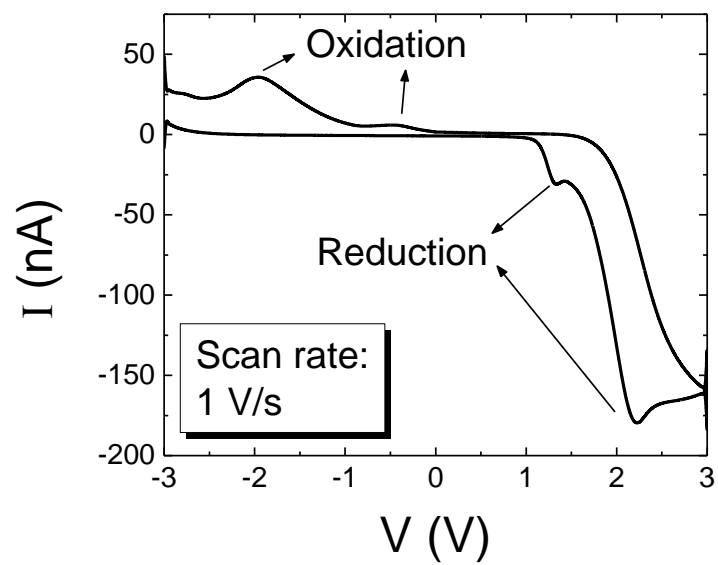

**Figure S3.** CV of the electrolyte-Ru<sub>2</sub>-oxide-silicon structure at 1 V/s scan rate.
